# Supplementary figures and images for: The Influence of Cross-border E-commerce Comprehensive Pilot Zone on Corporate Financial Constraints in China
Source: Research Square preprint supplement (doi:10.21203/rs.3.rs-5358159/v1), 2024-12-04

**Appendix**


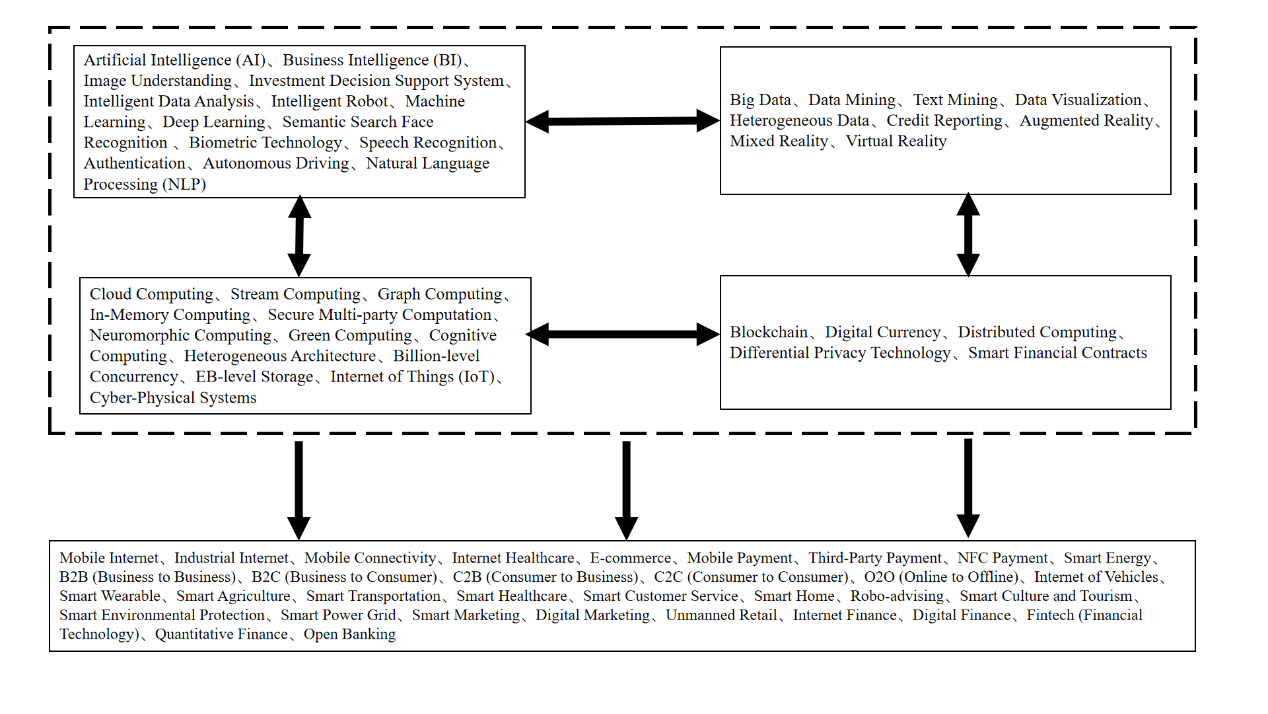


**Figure A** **Keywords for Collecting and Measuring Enterprises’ Digitalization**

Supplement: Supplementary file 1 [file d7ec5f6971b1bb9da292ce34.docx]
